# Supplementary material for: Reduced Racial Disparity as a Result of Survival Improvement in Prostate Cancer
Source: Cancers (Basel). 2023 Aug 4;15(15):3977. doi: 10.3390/cancers15153977 (PMC10417437; doi:10.3390/cancers15153977)
Supplement: Supplementary file 1 [file cancers-15-03977-s001.zip › Table S1.xlsx]

## Sheet: Sheet1
Table S1. Patient characteristics of the SEER-Prostate cancer cohort.
Characteristics	Race
Age	Non-hispanic white	African American	Asian	Hispanic
40–55	45990 (12.8%)	2410 (9%)	17737 (20.5%)	7940 (14.9%)
56–70	215783 (59.9%)	15573 (57.9%)	52385 (60.6%)	31337 (58.9%)
71–85	98748 (27.4%)	8921 (33.2%)	16332 (18.9%)	13960 (26.2%)
Year of diagnosis
2004-2008	126829 (35.2%)	8782 (32.6%)	27390 (31.7%)	16768 (31.5%)
2009-2013	138895 (38.5%)	10341 (38.4%)	33783 (39.1%)	21245 (39.9%)
2014-2018	94797 (26.3%)	7781 (28.9%)	25281 (29.2%)	15224 (28.6%)
Stage
I	14982 (4.2%)	1007 (3.7%)	3499 (4%)	2354 (4.4%)
II	261388 (72.5%)	18579 (69.1%)	62655 (72.5%)	36020 (67.7%)
III	38277 (10.6%)	3200 (11.9%)	7083 (8.2%)	5411 (10.2%)
IV	29045 (8.1%)	2646 (9.8%)	8463 (9.8%)	5772 (10.8%)
Unknown	16829 (4.7%)	1472 (5.5%)	4754 (5.5%)	3680 (6.9%)
Income
< USD 60,000	108163 (30%)	1704 (6.3%)	36434 (42.1%)	11012 (20.7%)
USD 60,000–USD 74,999	135074 (37.5%)	10365 (38.5%)	32900 (38.1%)	28539 (53.6%)
> USD 75,000	117250 (32.5%)	14834 (55.1%)	17117 (19.8%)	13665 (25.7%)
Unknown	34 (0%)	1 (0%)	3 (0%)	21 (0%)
Lymph node
Negative	329248 (91.3%)	24198 (89.9%)	77812 (90%)	46503 (87.4%)
Positive	12639 (3.5%)	1018 (3.8%)	3377 (3.9%)	2460 (4.6%)
Unknown	18634 (5.2%)	1688 (6.3%)	5265 (6.1%)	4274 (8%)
Distant metastasis
Negtive	332925 (92.3%)	24300 (90.3%)	77888 (90.1%)	47181 (88.6%)
Positive	18807 (5.2%)	1827 (6.8%)	6146 (7.1%)	3988 (7.5%)
Unknown	8789 (2.4%)	777 (2.9%)	2420 (2.8%)	2068 (3.9%)
Gleason score
≤6	74525 (35.9%)	5161 (31.7%)	17098 (32.2%)	12171 (37.2%)
7	80732 (38.9%)	5838 (35.9%)	21758 (41%)	11101 (33.9%)
8–10	39538 (19%)	4031 (24.8%)	10378 (19.6%)	6462 (19.7%)
Unknown	12837 (6.2%)	1232 (7.6%)	3841 (7.2%)	2985 (9.1%)
Mean PSA level (SD)	13.4 (20.68)	16.46 (23.36)	18.31 (26.36)	17.54 (25.59)
